# Supplementary material
Source: PubMed Central journal article supplement (PMC7409527)
Supplement: NIHMS1606743-supplement-Supplemental_figures_and_table.pdf [file NIHMS1606743-supplement-Supplemental_figures_and_table.pdf]

**Supplementary Figure 1.** Histogram of surgery start time (hours) by surgery type.

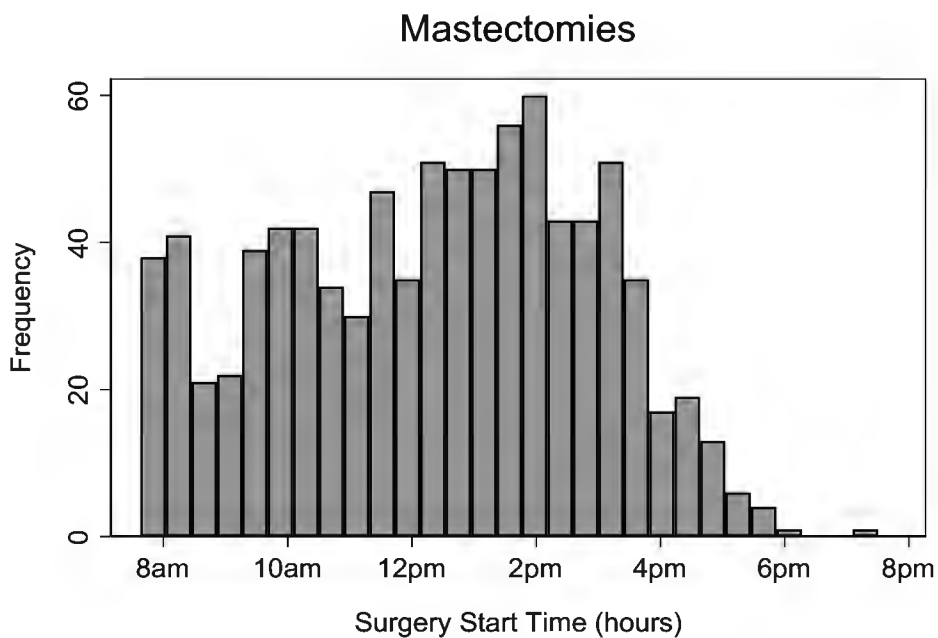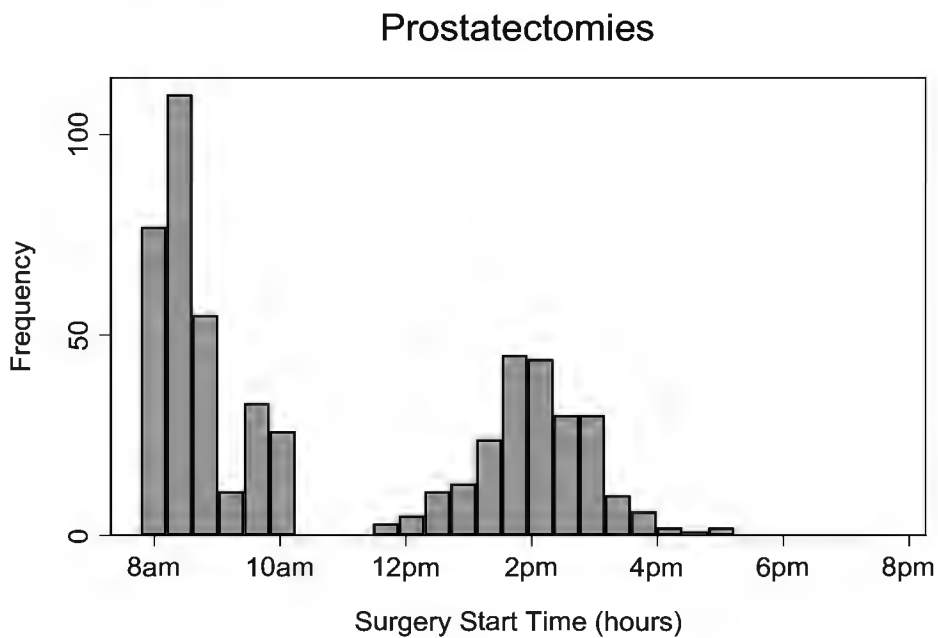

**Supplementary Figure 2.** Scatterplots of postoperative length of stay (hours) and discharge time (hours) versus surgery end time (hours) with the univariable predicted lines corresponding to Supplementary Table 1 overlaid among patients who underwent a mastectomy.

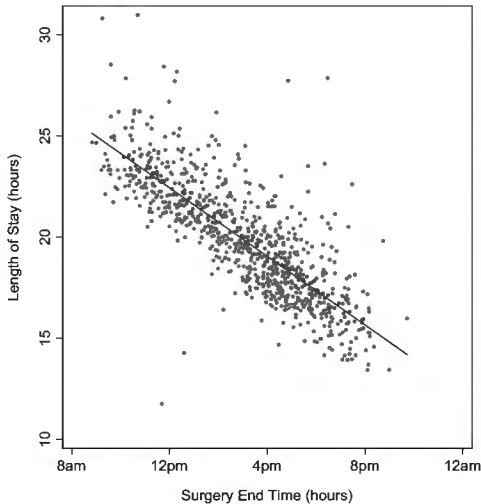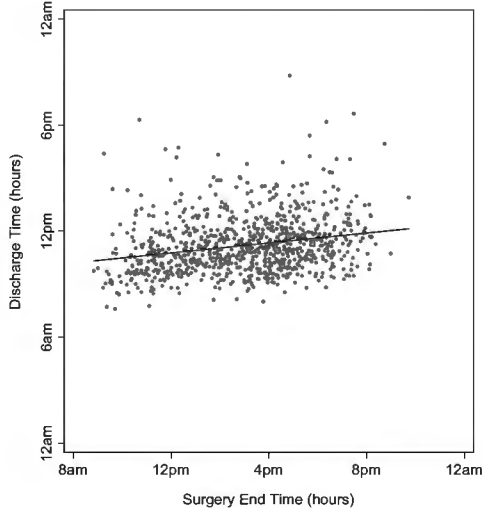

**Supplementary Figure 3.** Scatterplots of postoperative length of stay (hours) and discharge time (hours) versus surgery end time (hours) with the univariable predicted lines corresponding to Supplementary Table 1 overlaid among patients who underwent a prostatectomy.

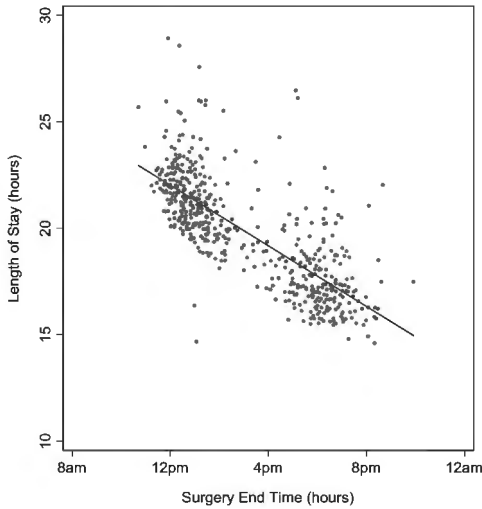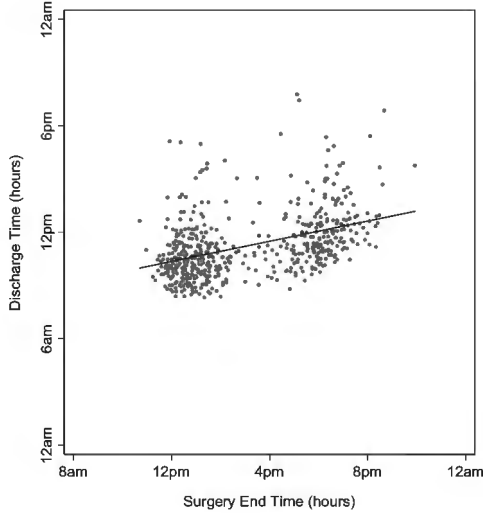

**Supplementary Table 1.** Univariable linear regression models for the associations between

surgery end time and the outcomes of interest by surgery type. The coefficient gives the change

in the outcome for a one hour later surgery end time. For instance, length of stay is 0.85 hours

shorter for breast cancer patients for each hour difference in surgery end time.

|                              | <b>Mastectomies (n=891)</b> |               |                | <b>Prostatectomies (n=538)</b> |               |                |
|------------------------------|-----------------------------|---------------|----------------|--------------------------------|---------------|----------------|
| <b>Outcome</b>               | <b>Coefficient</b>          | <b>95% CI</b> | <b>p-value</b> | <b>Coefficient</b>             | <b>95% CI</b> | <b>p-value</b> |
| Length of stay<br>(hours)    | -0.85                       | -0.89, -0.81  | <0.0001        | -0.71                          | -0.76, -0.66  | <0.0001        |
| Time of discharge<br>(hours) | 0.14                        | 0.10, 0.18    | <0.0001        | 0.29                           | 0.23, 0.34    | <0.0001        |
